1 Title: Clinical predictors of severe forms of influenza A H1N1 in adults and children during  
2 the 2009 epidemic in Brazil

3  
4 Short title: Predictors of severe influenza A H1N1

5 authors' information

6 Jose Ueleres Braga<sup>12\*</sup>

7 <sup>1</sup> Department of Epidemiology, Social Medicine Institute, Rio de Janeiro, Rio de Janeiro,  
8 Brazil

9 <sup>2</sup> Department of of Epidemiology and Quantitative Methods, National School of Public  
10 Health, Oswaldo Cruz Foundation, Rio de Janeiro, Rio de Janeiro, Brazil

11

12 \* Corresponding author

13 E-mail: [ueleres@gmail.com](mailto:ueleres@gmail.com)

14

15 Abstract:

16 The World Health Organization (WHO) raised the global alert level for the A(H1N1)  
17 influenza pandemic in June 2009. However, since the beginning of the epidemic, the fight  
18 against the epidemic lacked foundations for managing cases to reduce the disease lethality. It  
19 was urgent to carry out studies that would indicate a model for predicting severe forms of  
20 influenza. This study aimed to identify risk factors for severe forms during the 2009 influenza  
21 epidemic and develop a prediction model based on clinical epidemiological data. A case-  
22 control of cases notified to the health secretariats of the states of Rio de Janeiro, São Paulo,  
23 Minas Gerais, Paraná, and Rio Grande do Sul was conducted. Cases had fever, respiratory  
24 symptoms, positive confirmatory test for the presence of the virus associated with one of the  
25 three conditions: (i) presenting respiratory complications such as pneumonia, ventilatory  
26 failure, severe acute respiratory distress syndrome, sepsis, acute cardiovascular complications  
27 or death; or respiratory failure requiring invasive or non-invasive ventilatory support, (ii)  
28 having been hospitalized or (iii) having been admitted to an Intensive Care Unit. Controls  
29 were individuals diagnosed with the disease on the same date (or same week) as the cases. A  
30 total of 1653 individuals were included in the study, (858 cases/795 controls). These  
31 participants had a mean age of 26 years, a low level of education, and were mostly female.  
32 The most important predictors identified were systolic blood pressure in mmHg, respiratory  
33 rate in bpm, dehydration, obesity, pregnancy (in women), and vomiting (in children). Three  
34 clinical prediction models of severity were developed, for adults, adult women, and for  
35 children. The performance evaluation of these models indicated good predictive capacity.  
36 The area values under the ROC curve of these models were 0.89; 0.98 and 0.91 respectively  
37 for the model of adults, adult women, and children respectively.

38

39

**NOTE: This preprint reports new research that has not been certified by peer review and should not be used to guide clinical practice.**

## 40 Introduction

41 In April 2009, the World Health Organization (WHO) communicated to all countries the  
42 occurrence of a public health emergency of international concern (April 2009) caused by  
43 infection with a new influenza A H1N1 virus. This infection was believed to be related to the  
44 febrile respiratory illness epidemic that had begun in Mexico in March 2009. The virus was  
45 finally detected in tests performed on two children in California, United States, on April 17  
46 (1).

47 This situation led the WHO to raise the pandemic alert level to level 5 and adopt  
48 recommendations aimed at reducing the effects of the infection based on the activation of  
49 national preparedness plans for the H5N1 influenza pandemic adapted to the new epidemic.  
50 The characteristics of this epidemic showed a predominance in children and young adults and  
51 a low lethality (<1%), with the majority of cases being of mild-to-moderate influenza-like  
52 illness and a higher frequency of deaths in patients with an underlying chronic disease; most  
53 cases recovered without specific treatment. Transmission occurred through direct contact or  
54 with the respiratory secretions of infected persons. The first estimates based on the analysis  
55 of cases in Mexico indicated a lower transmissibility than estimated for previous influenza  
56 pandemics (2) and for the severe acute respiratory syndrome (SARS).

57 Until June 2009, suspected cases of this disease in Brazil were linked to travel abroad  
58 or some type of close contact. However, in mid-July 2009, after concluding the  
59 epidemiological investigation of a suspected case in São Paulo, the country presented  
60 sustained transmission. This led to changes in the identification, investigation, and  
61 management of cases of flu syndrome, since any person who had flu symptoms would also be  
62 considered a suspected case of influenza A H1N1 infection. These changes were included in  
63 the “Influenza Clinical Management and Epidemiological Surveillance Protocol” (3).  
64 Following the recommendation of the World Health Organization (WHO), this scenario

65 indicated the need to prioritize the notification, investigation, laboratory diagnosis, and  
66 treatment of cases with severe acute respiratory syndrome (SARS) and those people with risk  
67 factors for disease complications; these included individuals under 2 and over 60 years of  
68 age, pregnant women, those with chronic diseases, and immunosuppressed people. The new  
69 phase of studying the epidemic required monitoring cases in groups at risk of developing  
70 serious illness. At the time, Brazil was classified as a country that had a regional spread of  
71 this disease.

72 This study aims to identify the risk factors for the occurrence of severe forms during  
73 the 2009 influenza A H1N1 epidemic as well as to propose a prediction model based on  
74 clinical epidemiological data of cases notified to the Brazilian Epidemiological Surveillance  
75 System.

## 76 **Materials and Methods**

77 The research used a case-control study design (4) of cases of influenza A H1N1  
78 reported to the Health Surveillance of the health departments in the states of Rio de Janeiro,  
79 São Paulo, Minas Gerais, Paraná, and Rio Grande do Sul. The target population consisted of  
80 children, pregnant women, and adults with symptoms compatible with suspected infection by  
81 the influenza A H1N1 virus treated at the Health System.

82 Cases considered for this investigation were individuals with confirmed infection by  
83 the influenza A H1N1 virus with fever, respiratory symptoms, and a positive confirmatory  
84 test for the presence of the virus associated with one of the three conditions: (i) presenting  
85 respiratory complications such as pneumonia, ventilatory failure, severe acute respiratory  
86 distress syndrome, sepsis, acute cardiovascular complications, or death; or respiratory failure  
87 requiring invasive or non-invasive ventilatory support (CPAP, BIPAP, NIV, intubation)(4);  
88 (ii) having been hospitalized; or (iii) having been admitted to an intensive care unit.

89 To study the risk factors for the occurrence of severe cases of influenza A H1N1,  
90 three controls were chosen for each case. The criterion used was that they were individuals  
91 diagnosed with the disease on the same date (or in the same week) as the cases (5).  
92 Moreover, they should have been treated in the same health unit, hospital, or even intensive  
93 care unit if the case was treated there.

94 The minimum sample size was calculated for an alpha error of 5%, beta of 80%, and  
95 three controls for each case, resulting in 500 severe cases and 1,500 controls (6).

96 This study was approved by the Research Ethics Committee of the Institute of Social  
97 Medicine of Rio de Janeiro State University on December 4, 2009 (CAEE 0030.1.259.000-  
98 09). It was an observational study with secondary data extracted from medical records in a  
99 standardized way in which access to the records respected the precepts of secrecy and  
100 confidentiality of data and had the consent of the person responsible for the health institution  
101 where the patient received care. So, the need for consent was waived by the ethics committee.

## 102 **Results**

103 The research was based on data extracted from hospital records. It began in February  
104 2010 with an initial review of the medical records of all patients with a confirmed diagnosis of  
105 influenza A H1N1 infection who were hospitalized in the selected cities.

106 This study included 1,653 individuals. The number of cases and controls distributed  
107 among the federative units were as follows: Paraná (253 cases and 154 controls), Rio Grande  
108 do Sul (73 cases and 67 controls), Minas Gerais (55 cases and 188 controls), São Paulo (387  
109 cases and 111 controls), and Rio de Janeiro (90 cases and 275 controls).

110 These participants had a mean age of 26 years, and the study population ranged from  
111 newborns to older individuals. They had a low level of education and were mostly women.

112 However, a large proportion of the sample did not reveal their education level, and no  
113 differences were observed in this profile when samples from the five federated units were  
114 compared. The proportion of pregnant women ranged from 8% to 43% of the samples, but the  
115 lack of information was between 30% and 60%; thus, the samples from the federated units  
116 showed homogeneity.

117 Regarding laboratory confirmation, it is worth mentioning that practically all the  
118 samples consisted of individuals who had given nasopharyngeal samples collected directly by  
119 swab. As for treatment outcomes, over 90% had favorable results, and mortality was 10%  
120 among those enrolled in this investigation.

121 Obesity was found in about 10% of patients, and it was the second most prevalent  
122 morbid condition. Only hypertension was more prevalent, affecting almost 14% of patients on  
123 average. Cystic fibrosis, tuberculosis, and rheumatoid arthritis were less prominent than the  
124 abovementioned diseases, and other less frequent morbid conditions included cerebrovascular  
125 disease, Lupus, and acute liver disease.

126 A small number of patients had some level of immunosuppression, and it included  
127 those who had undergone a transplant and were using corticosteroids. This group also  
128 comprised those with morbid conditions of intermediate prevalence such as chronic  
129 obstructive pulmonary disease (COPD) and diabetes, with proportions close to 5%. In  
130 addition, no significant variation was observed in the previous history of disease of the  
131 samples from the various federated units.

132 As for health care, one in every five patients was admitted to the ICU and had an  
133 average stay of nine days. More than a fifth of these patients were transferred from other units  
134 for hospitalization purposes.

135 The illness of the study population showed a highly diversified clinical picture. Cough  
136 and fever were the most prevalent signs and symptoms at the time of patient admission;  
137 convulsion, conjunctivitis, irritability, and drowsiness were the least frequent findings. More

138 than half of the patients had dyspnea, while about a third had headaches, runny nose myalgia,  
139 and other symptoms.

140 Regarding the characteristics of the cases and controls classified by the severity  
141 condition adopted by the study, no significant differences were observed between the groups.  
142 The participants had similar age, gender, and level of education (Table 1).

143  
144 Table 1 – Biological and social characteristics, diagnostic conditions and outcomes of patients  
145 in the case-control study of risk factors for severity of H1N1 influenza, Brazil

| Characteristic                           | Severity rating |            |       |
|------------------------------------------|-----------------|------------|-------|
|                                          | severe          | not severe | Total |
| N                                        | 858             | 795        | 1653  |
| age (years)                              |                 |            |       |
| average                                  | 26.4            | 26.1       | 26.2  |
| Standart deviation                       | 18.8            | 18.9       | 18.9  |
| minimum                                  | 0.0             | 0.1        | 0.0   |
| maximum                                  | 90.0            | 94.0       | 94.0  |
| Sex (%)                                  |                 |            |       |
| female                                   | 58.4            | 55.9       | 56.9  |
| male                                     | 41.7            | 44.2       | 43.1  |
| Education (%)                            |                 |            |       |
| Illiterate                               | 2.1             | 0.5        | 1.2   |
| 1st-4th incomplete series of PE          | 3.5             | 4.5        | 4.1   |
| 4th complete series of PE                | 1.2             | 0.7        | 0.9   |
| 5th-8th incomplete grades of PE          | 3.7             | 3.5        | 3.6   |
| 8th grade complete PE or complete PE     | 1.6             | 3.3        | 2.6   |
| Incomplete high school                   | 2.1             | 2.3        | 2.2   |
| Complete high school                     | 4               | 3.7        | 3.9   |
| incomplete higher education              | 1.4             | 1.7        | 1.6   |
| complete higher education                | 3.9             | 10.5       | 7.7   |
| Missing                                  | 59.8            | 55.1       | 57.1  |
| Not applicable                           | 16.7            | 14.1       | 15.2  |
| Pregnance *(%)                           |                 |            |       |
| yes                                      | 26.8            | 23.3       | 24.9  |
| no                                       | 32              | 32.9       | 32.5  |
| missing                                  | 41.2            | 43.8       | 42.6  |
| Condition of laboratory confirmation (%) |                 |            |       |
| live                                     | 96.7            | 95.1       | 96.0  |
| post mortem                              | 0.4             | 1.1        | 0.7   |
| missing                                  | 2.9             | 3.9        | 3.3   |
| Laboratory confirmation material (%)     |                 |            |       |
| nasopharyngeal swab                      | 95.1            | 96.7       | 96.0  |
| tissue fragments                         | 1.1             | 0.4        | 0.7   |
| missing                                  | 3.9             | 2.9        | 3.3   |
| Disease outcome (%)                      |                 |            |       |
| death                                    | 20.0            | 4.0        | 10.9  |
| discharge/cure                           | 78.9            | 94.8       | 88.0  |
| hospital transfer                        | 1.1             | 0.7        | 0.8   |
| missing                                  | 0.0             | 0.5        | 0.3   |

146  
147

148  
149  
150  
151  
152  
153  
154  
155  
156  
157  
158  
159  
160  
161

Laboratory conditions for confirming the disease in H1N1 cases and controls were similar. However, patient outcomes differed between these groups, and the proportion of deaths was five times greater among cases than controls, which is a statistically significant difference. The other characteristics were similar (Table 1).

Obesity, which was prevalent in 10% of patients, and hypertension were similar between cases and controls. The other morbid conditions studied were similar in both groups. Less frequent morbid conditions that were similar among participants in both groups were cystic fibrosis, tuberculosis, and rheumatoid arthritis as well as cerebrovascular diseases, Lupus, and acute liver diseases (Table 2). Other past diseases also had similar distributions in the studied groups.

163 Table 2 – History of previous illnesses of cases and controls of the case-control study of risk  
 164 factors for severity of H1N1 influenza, Brazil

165

| Condition            | Severity rating |            |       | Condition                  | Severity rating |            |       |
|----------------------|-----------------|------------|-------|----------------------------|-----------------|------------|-------|
|                      | severe          | not severe | total |                            | severe          | not severe | total |
| N                    | 407             | 498        | 1653  | N                          | 407             | 498        | 1653  |
| Obesity (%)          |                 |            |       | Acute liver disease (%)    |                 |            |       |
| yes                  | 11.3            | 10.0       | 10.5  | yes                        | 0.5             | 0.4        | 0.5   |
| no                   | 88.8            | 90.0       | 89.5  | no                         | 99.5            | 99.6       | 99.6  |
| Hypertension (%)     |                 |            |       | Chronic liver disease (%)  |                 |            |       |
| yes                  | 14.9            | 12.9       | 13.8  | yes                        | 1.4             | 0.9        | 1.1   |
| no                   | 85.1            | 87.1       | 86.2  | no                         | 98.6            | 99.1       | 98.9  |
| Coronary Disease (%) |                 |            |       | Hematological Disease (%)  |                 |            |       |
| yes                  | 2.5             | 2.7        | 2.6   | yes                        | 4.4             | 4.1        | 4.2   |
| no                   | 97.5            | 97.3       | 97.4  | no                         | 95.6            | 95.9       | 95.8  |
| CVD (%)              |                 |            |       | Lupus (%)                  |                 |            |       |
| yes                  | 0.4             | 0.8        | 0.6   | yes                        | 0.5             | 0.7        | 0.6   |
| no                   | 99.7            | 99.2       | 99.4  | no                         | 99.5            | 99.3       | 99.4  |
| Heart Failure (%)    |                 |            |       | Rheumatoid arthritis (%)   |                 |            |       |
| yes                  | 2.5             | 1.5        | 1.9   | yes                        | 0.4             | 0.1        | 0.2   |
| no                   | 97.5            | 98.5       | 98.1  | no                         | 99.7            | 99.9       | 99.8  |
| Diabetes (%)         |                 |            |       | HIV (%)                    |                 |            |       |
| yes                  | 6.3             | 5.9        | 6.1   | yes                        | 1.6             | 2          | 1.8   |
| no                   | 93.7            | 94.2       | 93.9  | no                         | 98.4            | 98         | 98.2  |
| Thyroid disease (%)  |                 |            |       | AIDS (%)                   |                 |            |       |
| yes                  | 3.2             | 3.1        | 3.1   | yes                        | 1.1             | 1.5        | 1.3   |
| no                   | 96.8            | 96.9       | 96.9  | no                         | 99              | 98.5       | 98.7  |
| COPD (%)             |                 |            |       | Neoplasm (%)               |                 |            |       |
| yes                  | 5.3             | 3.5        | 4.5   | yes                        | 2.3             | 2.8        | 2.6   |
| no                   | 94.7            | 96.5       | 95.5  | no                         | 97.7            | 97.2       | 97.4  |
| Tuberculosis (%)     |                 |            |       | Organ transplantation (%)  |                 |            |       |
| yes                  | 0.0             | 0.1        | 0.1   | yes                        | 0.7             | 1.1        | 0.9   |
| no                   | 100             | 99.9       | 99.9  | no                         | 99.3            | 98.9       | 99.1  |
| Cystic fibrosis (%)  |                 |            |       | Use of Corticosteroids (%) |                 |            |       |
| yes                  | 0.0             | 0.1        | 0.1   | yes                        | 3.5             | 5.2        | 4.5   |
| no                   | 100             | 99.9       | 99.9  | no                         | 96.5            | 94.8       | 95.5  |

166  
 167  
 168  
 169 Regarding the history of assistance received, the groups showed important differences.

170 For the presence of signs and symptoms upon hospital admission, severe cases had more  
 171 important respiratory symptoms, such as dyspnea and cough, compared to controls; they also



172 showed a greater occurrence of fever. The other symptoms did not show a higher frequency  
173 among severe cases. In fact, for less specific clinical symptoms, these patients had a highly  
174 similar profile (Table 3).

175

176 Table 3 – Symptoms reported on hospital admission of cases and controls from the case-  
177 control study of risk factors for severity of H1N1 influenza, Brazil

178

| Condition          | Severity rating |            |       | Condition            | Severity rating |            |       |
|--------------------|-----------------|------------|-------|----------------------|-----------------|------------|-------|
|                    | severe          | not severe | total |                      | severe          | not severe | total |
| N                  | 407             | 498        | 1653  |                      | 407             | 498        | 1653  |
| Fever (%)          |                 |            |       | Nasal congestion (%) |                 |            |       |
| yes                | 96.5            | 91.9       | 93.9  | yes                  | 12.5            | 12.8       | 12.6  |
| no                 | 2.1             | 5.3        | 3.9   | no                   | 21.4            | 32.3       | 27.6  |
| missing            | 1.4             | 2.8        | 2.2   | missing              | 66.1            | 54.9       | 59.7  |
| Cough (%)          |                 |            |       | Diarrhea (%)         |                 |            |       |
| yes                | 94.4            | 91         | 92.4  | yes                  | 10.4            | 9.3        | 9.8   |
| no                 | 0.7             | 3.1        | 2.0   | no                   | 33.9            | 43.9       | 39.6  |
| missing            | 4.9             | 6.0        | 5.5   | missing              | 55.7            | 46.8       | 50.6  |
| Headache (%)       |                 |            |       | Vomiting (%)         |                 |            |       |
| yes                | 25.7            | 35.1       | 31.0  | yes                  | 19.5            | 19.0       | 19.2  |
| no                 | 17.6            | 24.6       | 21.6  | no                   | 26.7            | 36.2       | 32.1  |
| missing            | 56.8            | 40.3       | 47.4  | missing              | 53.8            | 44.8       | 48.7  |
| Chill (%)          |                 |            |       | Seizures (%)         |                 |            |       |
| yes                | 12.5            | 9.2        | 10.6  | yes                  | 1.6             | 2.1        | 1.9   |
| no                 | 25.1            | 35.5       | 31.0  | no                   | 25.7            | 41.9       | 34.9  |
| missing            | 62.4            | 55.3       | 58.4  | missing              | 72.8            | 56.0       | 63.2  |
| Dyspnea (%)        |                 |            |       | Asthenia (%)         |                 |            |       |
| yes                | 75.2            | 54.5       | 63.4  | yes                  | 22.1            | 21.9       | 22    |
| no                 | 9.1             | 23.3       | 17.2  | no                   | 14.8            | 27.0       | 21.7  |
| missing            | 15.6            | 22.2       | 19.4  | missing              | 63.1            | 51.1       | 56.3  |
| Sore throat (%)    |                 |            |       | Lack of appetite (%) |                 |            |       |
| yes                | 18.3            | 25.7       | 22.5  | yes                  | 18.1            | 15.6       | 16.7  |
| no                 | 26.2            | 31.7       | 29.3  | no                   | 18.6            | 30.3       | 25.3  |
| missing            | 55.5            | 42.7       | 48.2  | missing              | 63.3            | 54.1       | 58.1  |
| Arthralgia (%)     |                 |            |       | Irritability (%)     |                 |            |       |
| yes                | 10              | 7.7        | 8.7   | yes                  | 3.3             | 2.0        | 2.6   |
| no                 | 27.9            | 37.5       | 33.4  | no                   | 22.5            | 37.1       | 30.8  |
| missing            | 62              | 54.8       | 57.9  | missing              | 74.2            | 60.9       | 66.6  |
| Myalgia (%)        |                 |            |       | Somnolence (%)       |                 |            |       |
| yes                | 45.5            | 43.9       | 44.6  | yes                  | 5.3             | 3.2        | 4.1   |
| no                 | 13.5            | 22.5       | 18.6  | no                   | 23.7            | 37.9       | 31.8  |
| missing            | 41              | 33.6       | 36.8  | missing              | 71              | 58.9       | 64.1  |
| Conjunctivitis (%) |                 |            |       | Other symptoms (%)   |                 |            |       |
| yes                | 1.6             | 2.4        | 2.0   | yes                  | 47.1            | 32.5       | 38.8  |
| no                 | 31.8            | 41.1       | 37.1  | no                   | 23.4            | 47.5       | 37.1  |
| missing            | 66.6            | 56.5       | 60.9  | missing              | 29.5            | 20.1       | 24.2  |
| Runny nose(%)      |                 |            |       |                      |                 |            |       |
| yes                | 30.4            | 36.8       | 34.1  |                      |                 |            |       |
| no                 | 20.7            | 26.7       | 24.2  |                      |                 |            |       |
| missing            | 48.9            | 36.4       | 41.8  |                      |                 |            |       |

179

180

181

182 Initially, exploratory analyses were conducted to identify the main factors related to the

183 severity of cases of influenza A H1N1. The factors described in the literature and those  
184 aspects whose frequency of evaluation and registration in the medical records allowed for  
185 analysis were taken as a basis. The first model studied and constructed was the one related to  
186 the severity of cases in adults (Table 4).

187 Table 4 – Risk factors associated with the severity of influenza A (H1N1) in adults, Brazil

| Risk factor                                    | crudeOR | CI 95%       | adjOR        | CI 95%              |
|------------------------------------------------|---------|--------------|--------------|---------------------|
| <b>Adult</b>                                   |         |              |              |                     |
| Systolic Blood Pressure in mmHg                | 1.01    | 1.01 - 1.02  | <b>1.02</b>  | <b>1.01 - 1.03</b>  |
| Diastolic Blood Pressure in mmHg               | 1.00    | 0.99 - 1.01  | 0.99         | 0.96 - 1.01         |
| Heart Rate in bpm                              | 1.00    | 0.99 - 1.01  | 0.99         | 0.97 - 1.01         |
| Respiratory Rate in bpm                        | 1.06    | 1.05 - 1.07  | <b>1.05</b>  | <b>1.01 - 1.08</b>  |
| Axillary temperature in °C                     | 1.01    | 0.89 - 1.13  | 1.10         | 0.90 - 1.34         |
| Mental confusion                               | 3.56    | 1.55 - 8.21  | 1.40         | 0.31 - 6.20         |
| Dehydration                                    | 2.20    | 1.44 - 3.39  | <b>2.69</b>  | <b>1.34 - 5.39</b>  |
| Impaired general condition/Toxemia/Prostration | 2.62    | 1.93 - 3.57  | 1.29         | 0.73 - 2.26         |
| Cyanosis                                       | 2.69    | 1.44 - 4.99  | 1.01         | 0.29 - 3.39         |
| Somnolence                                     | 4.25    | 1.85 - 9.76  | 18.95        | 0.45 - 7.97         |
| Obesity                                        | 1.68    | 1.08 - 2.61  | 1.60         | 0.81 - 3.19         |
| <b>Adult (women only)</b>                      |         |              |              |                     |
| Systolic Blood Pressure in mmHg                | 1.01    | 1.01 - 1.02  | 1.03         | 0.98 - 1.08         |
| Diastolic Blood Pressure in mmHg               | 1.01    | 0.99 - 1.02  | 0.96         | 0.89 - 1.05         |
| Heart Rate in bpm                              | 1.01    | 0.99 - 1.02  | 0.97         | 0.94 - 1.01         |
| Respiratory Rate in bpm                        | 1.05    | 1.00 - 1.08  | 1.04         | 0.97 - 1.12         |
| Axillary temperature in °C                     | 1.04    | 0.88 - 1.22  | 0.96         | 0.50 - 1.82         |
| Mental confusion                               | 3.54    | 1.24 - 10.11 |              |                     |
| Dehydration                                    | 1.94    | 1.10 - 3.42  | <b>30.36</b> | <b>2.85 - 3.23</b>  |
| Impaired general condition/Toxemia/Prostration | 2.28    | 1.55 - 3.37  | 0.95         | 0.23 - 3.94         |
| Cyanosis                                       | 1.77    | 0.82 - 3.82  |              |                     |
| Somnolence                                     | 3.43    | 1.17 - 10.09 | 4.20         | 0.19 - 9.22         |
| Obesity                                        | 1.94    | 1.09 - 3.45  | <b>3.84</b>  | <b>1.06 - 13.83</b> |
| Pregnancy                                      | 1.15    | 0.78 - 1.70  | <b>5.43</b>  | <b>1.27 - 23.13</b> |
| <b>Child</b>                                   |         |              |              |                     |
| Systolic Blood Pressure in mmHg                | 1.00    | 0.98 - 1.02  | 0.99         | 0.96 - 1.04         |
| Diastolic Blood Pressure in mmHg               | 1.01    | 0.99 - 1.04  | 1.04         | 0.98 - 1.10         |
| Heart Rate in bpm                              | 1.02    | 1.01 - 1.03  | 1.01         | 0.99 - 1.04         |
| Respiratory Rate in bpm                        | 1.06    | 1.04 - 1.08  | <b>1.06</b>  | <b>1.01 - 1.12</b>  |
| Axillary temperature in °C                     | 0.99    | 0.91 - 1.08  | 0.82         | 0.46 - 1.44         |
| Nose wing beat                                 | 1.23    | 1.15 - 1.32  | 0.93         | 0.68 - 1.27         |
| Intercostal indrawing                          | 1.17    | 1.09 - 1.25  | 1.20         | 0.89 - 1.60         |
| Dehydration                                    | 0.98    | 0.89 - 1.07  | 1.17         | 0.88 - 1.57         |
| Impaired general condition/Toxemia/Prostration | 1.02    | 0.94 - 1.11  | 0.89         | 0.71 - 1.13         |
| Cyanosis                                       | 1.03    | 0.95 - 1.12  | 0.80         | 0.63 - 1.03         |
| Lack of appetite                               | 1.12    | 1.05 - 1.20  | 0.82         | 0.65 - 1.05         |
| Vomiting                                       | 1.20    | 1.12 - 1.28  | <b>1.32</b>  | <b>1.08 - 1.61</b>  |
| Difficulty swallowing fluids                   | 1.18    | 1.10 - 1.27  | 1.14         | 0.87 - 1.48         |
| Somnolence                                     | 1.16    | 1.09 - 1.25  | 1.16         | 0.93 - 1.46         |

188  
189  
190  
191 Considering only adult patients, the factors most strongly associated with severity in  
192 the bivariate analysis were drowsiness and mental confusion. Only the signs of systolic blood

193 pressure and respiratory rate were associated with statistical significance at the 5% level.

194 Obesity was associated with severity when putative confounders were not considered.

195 After adjustment for the set of clinical factors, it was observed that only systolic blood  
196 pressure, respiratory rate, and dehydration remained associated when multiple logistic  
197 regression was used. In addition to these aspects, biological factors such as age and sex were  
198 evaluated and were not associated with severity (Table 4).

199 As pregnancy is considered a condition that may be associated with severity, it was  
200 necessary to make a specific model for women. In this case, in addition to the aspects used for  
201 the general adult population, the condition of pregnancy was included among the factors  
202 studied (Table 4).

203 Similar to the prediction model studied for adults in general, in pregnant women, most  
204 of the factors described in the literature were associated with severity in the bivariate context,  
205 which draws attention to the importance of dehydration appearing in this adult model.  
206 However, the aspects that should be emphasized the most are obesity, which gains importance  
207 for predicting severity, and pregnancy, which appears to be the second most important factor  
208 for predicting this clinical condition (Table 4).

209 As we considered the elaboration of a specific model for women, we also decided to  
210 construct a specific one for the group of patients under 13 years of age as the factors that  
211 influence the occurrence of severity in this group are different from those affecting adults.

212 The specific literature on risk factors for severe forms of influenza A H1N1 indicates a  
213 set of factors seemingly more specific to this age group, such as the existence of clinical signs  
214 of intercostal retraction and nasal flaring, in addition to classic ones such as dehydration.

215 Similar to the models built for predicting severity in adults, exploratory analyses were  
216 initially performed to identify important associations with all the factors described in the  
217 literature, using data extracted from the medical records.

218 In patients younger than 13 years, despite the large number of factors associated with

219 the severity of influenza A H1N1 in the bivariate context, no strong associations were found  
220 with the factors observed in adult models. Biological aspects such as age and gender were not  
221 associated, even when considered without adjustment for the other factors; the same occurred  
222 for obesity. It is noteworthy that, as in the adult model, only respiratory rate and the  
223 occurrence of vomiting were associated with severe disease in the multivariate context (Table  
224 4).

225 The models built in this work show good performance as they included performance  
226 measures that indicate good predictive capacity. The area under the ROC curve values of  
227 these models were 0.89, 0.98, and 0.91 for the model of adults, adult women, and children,  
228 respectively.

## 229 **Discussion**

230 The main research findings were the prediction models of severe forms of influenza A  
231 H1N1 specific for adults, adult women, and children. These models showed a high ability to  
232 discriminate severe forms since they have high values of area under the curve. However, the  
233 fact that these models were produced based on the occurrence of the 2009 influenza epidemic  
234 in Brazil could bring limitations about the external validity of this prediction capacity (7). The  
235 most important predictors identified in our research were systolic blood pressure in mmHg,  
236 respiratory rate in bpm, dehydration, obesity, pregnancy (in women), and vomiting (in  
237 children). It is worth noting that the good performance of these models can help improve  
238 approaches to surveillance, case management, and coping with future epidemics.

239 The need to overcome the difficulties of constructing and validating prediction models  
240 to predict the most severe clinical conditions during the epidemic has mobilized several  
241 researchers to disseminate epidemiological methods applied to the construction and validation  
242 of these models (8). Even so, the absence of external validation in the development process

243 does not make models less important than those produced in our work.

244 The literature shows few studies of construction and validation of prediction related to  
245 influenza. Two stand out—a study on the prediction of respiratory infection by the influenza  
246 virus (9) and a systematic review of models for predicting this viral infection (10). However,  
247 no publication is available on the development and validation of a prediction model for severe  
248 forms including adults, adult women, and children.

249 Concerning risk factors for severe forms of influenza A H1N1, it should be noted that  
250 few studies have been published in the literature. Many studies have described the  
251 characteristics of severe cases and reported that underlying chronic diseases, delay in antiviral  
252 therapy, pregnancy, and obesity may be risk factors (11)(12)(13).

253 A study conducted in the United Kingdom (14) that used an epidemiological design  
254 (case note-based investigation) whose control was the population of London and Northern  
255 Ireland (> 70% of cases) sought to identify risk factors for hospitalization and outcomes  
256 unfavorable conditions during the first wave of the 2009 influenza A H1N1 pandemic. The  
257 authors concluded that an abnormal chest X-ray or an elevated CRP level indicates a  
258 potentially serious outcome, especially in patients registered as obese or who have lung  
259 diseases other than asthma or COPD. They also indicated that these findings support the use  
260 of the pandemic vaccine in pregnant women, children < 5 years of age, and people with  
261 chronic lung disease. Similarly, Myles et al. (15) sought to identify predictors of clinical  
262 outcomes in a national cohort hospitalized during both waves of the 2009–2010 influenza A  
263 H1N1 epidemic in the United Kingdom, using a profile comparison of patients with seasonal  
264 winter admissions by acute respiratory infection. They concluded that independent predictors  
265 of severe outcome were age between 55 and 64 years, chronic lung disease (not asthma, non-  
266 chronic obstructive pulmonary disease), neurological disease, registered obesity, late  
267 admission ( $\geq 5$  days after illness onset), pneumonia, C-reactive protein  $\geq 100$  mg/liter, and the  
268 need for supplemental oxygen or intravenous fluid replacement on admission.

269 Fang et al. (16) conducted a case-control study to explore risk factors for severe cases  
270 of the 2009 influenza A H1N1, with mild cases as controls. They randomly selected mild and  
271 severe cases (230 cases each) from nine cities in Zhejiang Province, China, and performed a  
272 case-control study. They found that it took an average of five days for severe 2009 influenza  
273 A H1N1 cases to start antiviral therapy far from baseline—two days after mild cases. Having  
274 underlying chronic illnesses and poor psychological health combined with underlying chronic  
275 illnesses were two important risk factors for severe cases, and timely antiviral therapy was a  
276 protective factor. The authors concluded that psychological health education and intervention,  
277 as well as timely antiviral therapy, could not be ignored in the prevention, control, and  
278 treatment of 2009 influenza A H1N1.

279 Ren et al. (17) conducted a case-control study with 343 critically ill hospitalized  
280 patients and 343 randomly selected mild controls. The diagnosis was established by assessing  
281 clinical symptoms and confirmed by real-time reverse transcriptase polymerase chain reaction  
282 assay. Severe or mild patients were classified according to uniform criteria issued by the  
283 Chinese Ministry of Health. According to the authors, multivariate logistic regression analysis  
284 showed that overweight or obese individuals admitted to the hospital with H1N1 flu were  
285 more likely to have severe manifestations of the disease. Moreover, individuals younger than  
286 5 years old or older than 60 years old had an increased risk of severe manifestations. They  
287 also observed an increased risk among individuals with a longer time interval from the onset  
288 of symptoms to hospital admission and found that those with chronic illnesses were at  
289 increased risk of severe manifestations of the H1N1 flu.

290 Studies on the risk factors for hospitalization for influenza A H1N1 have been  
291 conducted in several countries, finding the causes of hospitalization to be many stools as a  
292 result of severe evolution of clinical conditions. Launes et al. (18) conducted a multicenter  
293 study (case-control design) to compare sociodemographic data and preexisting medical  
294 conditions of risk in patients with 2009 influenza A H1N1 infection who required

295 hospitalization and those treated on an outpatient basis. Cases were patients aged 6 months to  
296 18 years hospitalized for influenza syndrome, for whom infection with the 2009 influenza A  
297 H1N1 was confirmed using transcription polymerase chain reaction (TR-PCR). Controls were  
298 patients aged between 6 months and 18 years with confirmed 2009 influenza A H1N1, treated  
299 as outpatients. Cases were 195 and controls 184. Launes et al. concluded that hospitalization  
300 was more frequent in children aged  $< 2$  years, in those with neurological and/or  
301 neuromuscular diseases, and those whose parents had an education level lower than high  
302 school. Children younger than 2 years old, with neurological diseases, and from families with  
303 a lower level of education were at higher risk of hospitalization due to infection with 2009  
304 influenza A H1N1.

305 Another study of risk factors for hospitalization was conducted by Ward et al. (19) in  
306 Sydney, Australia, which included included 302 cases and 603 controls. In a logistic  
307 regression model, after adjusting for age and sex, risk factors for hospitalization were  
308 pregnancy, immunosuppression, pre-existing lung disease, asthma requiring regular  
309 preventive medication, heart disease, diabetes, and current smoker or former smoker.

310 Some investigations have sought to answer whether obesity is a predictor of the  
311 evolution of influenza cases that occur during an epidemic. A case-control study was  
312 conducted in seven regions of Spain to investigate the association between body mass index  
313 (BMI) and the risk of hospitalization for influenza in 2009–2010 and 2010–2011. Martin et al.  
314 (20) selected cases among patients hospitalized for  $> 24$  h with influenza-like illness, acute  
315 respiratory infection, septic shock, or multiple organ failure among whom 2009 influenza A  
316 H1N1 virus infection was confirmed by reaction in polymerase chain with real-time reverse  
317 transcription (RT-PCR). Hospitalized patients ( $n = 755$ ) with laboratory-confirmed influenza  
318 were individually matched by age, date of admission/appointment, and province, with an  
319 outpatient ( $n = 783$ ) with laboratory-confirmed influenza and an outpatient control ( $n = 950$ ).  
320 Higher BMI was associated with an increased risk of hospitalization compared with outpatient

321 cases and outpatient controls. Compared with normal weight, type I obesity, type II obesity,  
322 and type III obesity were associated with a higher likelihood of hospitalization compared with  
323 outpatient cases. Compared with normal weight, type II obesity and type III obesity were  
324 associated with a higher likelihood of hospitalization compared with outpatient controls.

325 A condition not investigated in our study was whether the vaccination status for the  
326 specific influenza vaccine would be a predictor of severe forms of the disease. This was not  
327 possible because no vaccination was conducted in Brazil during the investigation's field  
328 phase. However, enough studies are available for systematic reviews with meta-analyses to be  
329 produced. The systematic review conducted by Rondy et al. (21) included case-control  
330 studies; the authors identified 3,411 publications, of which 30 met the inclusion criteria.  
331 Between 2010–11 and 2014–15, vaccine effectiveness was 41% (95% CI: 34; 48) for any flu  
332 (51%–95% CI: 44; 58).

333 We consider that the three prediction models of severe clinical forms of influenza A  
334 H1N1 specific for adults, adult women, and children can be used to address future influenza  
335 epidemics—at least to guide the investigation of cases with a greater probability of evolving  
336 into severe forms.

337

## 338 **Acknowledgments**

339 We appreciate the help of collaborators Ana Freitas Ribeiro, Guilherme Loureiro Werneck,  
340 Bernardino Claudio de Albuquerque, Sonia Raboni and, Ricardo Kuchenbecker.

341

342



## 343 **References**

- 344  
345 1. Centers for Disease Control and Prevention CDC. Swine influenza A (H1N1) infection in  
346 two children--Southern California, March-April 2009. *MMWR*. 2009 Apr 24;58(15):400–  
347 2.
- 348 2. Fraser C, Donnelly CA, Cauchemez S, Hanage WP, Van Kerkhove MD, Hollingsworth  
349 TD, et al. Pandemic Potential of a Strain of Influenza A (H1N1): Early Findings. *Science*.  
350 2009 Jun 19;324(5934):1557–61.
- 351 3. BRASIL, Ministério da Saúde, Secretaria de Vigilância em Saúde, Gabinete Permanente de  
352 Emergências de Saúde Pública. PROTOCOLO DE MANEJO CLÍNICO E VIGILÂNCIA  
353 EPIDEMIOLÓGICA DA INFLUENZA. 2009 p. 32.
- 354 4. Schlesselman JJ, Stolley PD. Case-control studies : design, conduct, analysis. New York:  
355 Oxford University Press; 1982. xv, 354 p.
- 356 5. Wacholder S, McLaughlin JK, Silverman DT, Mandel JS. Selection of controls in case-  
357 control studies. I. Principles. *Am J Epidemiol*. 1992;135(9):1019-28.
- 358 6. Wacholder S, Silverman DT, McLaughlin JK, Mandel JS. Selection of controls in case-  
359 control studies. III. Design options. *Am J Epidemiol*. 1992;135(9):1042-50.
- 360 7. Chen L. Overview of clinical prediction models. *Ann Transl Med*. 2020 Feb;8(4):71.
- 361 8. Steyerberg EW, Vergouwe Y. Towards better clinical prediction models: seven steps for  
362 development and an ABCD for validation. *Eur Heart J*. 2014 Aug 1;35(29):1925–31.
- 363 9. Vuichard-Gysin D, Mertz D, Pullenayegum E, Singh P, Smieja M, Loeb M. Development  
364 and validation of clinical prediction models to distinguish influenza from other viruses  
365 causing acute respiratory infections in children and adults. *PloS One*.  
366 2019;14(2):e0212050.
- 367 10. Ebell MH, Rahmatullah I, Cai X, Bentivegna M, Hulme C, Thompson M, et al. A  
368 Systematic Review of Clinical Prediction Rules for the Diagnosis of Influenza. *J Am Board  
369 Fam Med JABFM*. 2021 Dec;34(6):1123–40.
- 370 11. Echevarría-Zuno S, Mejía-Arangur JM, Mar-Obeso AJ, Grajales-Muñiz C, Robles-  
371 Pérez E, González-León M, et al. Infection and death from influenza A H1N1 virus in  
372 Mexico: a retrospective analysis. *The Lancet*. 2009;374(9707):2072–9.
- 373 12. Falagas M, Koletsi P, Baskouta E, Rafailidis P, Dimopoulos G, Karageorgopoulos D.  
374 Pandemic A (H1N1) 2009 influenza: review of the Southern Hemisphere experience.  
375 *Epidemiol Infect*. 2011;139(1):27–40.
- 376 13. Enstone JE, Myles PR, Openshaw PJ, Gadd EM, Lim WS, Semple MG, et al.  
377 Nosocomial Pandemic (H1N1) 2009, United Kingdom, 2009–2010. *Emerg Infect Dis*.  
378 2011;17(4):592.

- 379 14. Nguyen-Van-Tam JS, Openshaw PJM, Hashim A, Gadd EM, Lim WS, Semple MG, et  
380 al. Risk factors for hospitalisation and poor outcome with pandemic A/H1N1 influenza:  
381 United Kingdom first wave (May-September 2009). *Thorax*. 2010 Jul 1;65(7):645–51.
- 382 15. Myles PR, Semple MG, Lim WS, Openshaw PJ, Gadd EM, Read RC, et al. Predictors  
383 of clinical outcome in a national hospitalised cohort across both waves of the influenza  
384 A/H1N1 pandemic 2009–2010 in the UK. *Thorax*. 2012;67(8):709–17.
- 385 16. Fang L, Lin J, Chai C, Yu Z. Risk factors for severe cases of 2009 influenza A  
386 (H1N1): a case control study in Zhejiang Province, China. *PLoS One*. 2012;7(3):e34365.
- 387 17. Ren Y yan, Yin Y yan, Li W qing, Lin Y, Liu T, Wang S, et al. Risk factors associated  
388 with severe manifestations of 2009 pandemic influenza A (H1N1) infection in China: a  
389 case–control study. *Virol J*. 2013;10(1):1–7.
- 390 18. Launes C, García-García JJ, Martínez-Planas A, Moraga F, Astigarraga I, Arístegui J,  
391 et al. 2009 H1N1: risk factors for hospitalization in a matched case-control study. *Eur J*  
392 *Pediatr*. 2012;171:1127–31.
- 393 19. Ward K. Case-Control Study of Risk Factors for Hospitalization Caused by Pandemic  
394 (H1N1) 2009. *Emerg Infect Dis* [Internet]. 2011 Aug [cited 2023 Aug 23]; Available from:  
395 [http://wwwnc.cdc.gov/eid/article/17/8/10-0842\\_article.htm](http://wwwnc.cdc.gov/eid/article/17/8/10-0842_article.htm)
- 396 20. Martín V, Castilla J, Godoy P, Delgado-Rodríguez M, Soldevila N, Fernández-Villa T,  
397 et al. High Body Mass Index as a Risk Factor for Hospitalization Due to Influenza: A  
398 Case–Control Study. *Arch Bronconeumol Engl Ed*. 2016;52(6):299–307.
- 399 21. Rondy M, El Omeiri N, Thompson MG, Levêque A, Moren A, Sullivan SG.  
400 Effectiveness of influenza vaccines in preventing severe influenza illness among adults: A  
401 systematic review and meta-analysis of test-negative design case-control studies. *J Infect*.  
402 2017 Nov;75(5):381–94.
- 403
- 404
